# Supplementary material
Source: publisher figshare collection journal article supplement (https://adisjournals.figshare.com/ndownloader/files/34856478)
Supplement: Supplementary file 1 [file 34856478]

## Faricimab: AdisInsight Report

### Key Points

- A bispecific antibody that inhibits both the VEGF-A and Ang-2 pathways has been developed by Roche/Genentech for the treatment of retinal vascular diseases
- Received its first approvals on 28 January 2022 in the USA
- Approved for use in nAMD and DME

### Summary

- Faricimab (faricimab-svoa; Vabysmo™) is a bispecific antibody that binds to and inhibits both vascular endothelial growth factor (VEGF)-A and angiopoietin-2 (Ang-2).
- Administered by intravitreal injection, faricimab is being developed by Roche/Genentech for use in the treatment of retinal vascular diseases.
- In January 2022 faricimab received its first approvals, in the USA, for use in the treatment of patients with neovascular (wet) age-related macular degeneration (nAMD) or diabetic macular edema (DME).
- Faricimab is also currently under regulatory review in the EU and Japan for use in nAMD and DME.
- Phase III clinical development of faricimab for use in the treatment of nAMD, DME, and macular edema due to retinal vein occlusion is continuing in multiple other countries worldwide.
- This article summarizes the milestones in the development of faricimab leading to these first approvals for nAMD and DME in the USA.

This summary represents the opinions of the author. For a full list of declarations, including funding and author disclosure statements, please see the full text online. © Springer Nature Switzerland AG 2022.
